# Supplementary material for: Structure Elucidation of Unknown Metabolites in Metabolomics by Combined NMR and MS/MS Prediction
Source: Metabolites. 2018 Jan 17;8(1):8. doi: 10.3390/metabo8010008 (PMC5875998; doi:10.3390/metabo8010008)
Supplement: Supplementary file 1 [file metabolites-08-00008-s001.pdf]

|                                                                                                                                                                                                                                                                                                                                                         |                                                                                    |       |      |       |      |       |      |       |      |       |      |       |      |       |                                                                                                                                                                                                                                                                                                                    |      |       |      |       |      |       |      |       |      |       |      |       |
|---------------------------------------------------------------------------------------------------------------------------------------------------------------------------------------------------------------------------------------------------------------------------------------------------------------------------------------------------------|------------------------------------------------------------------------------------|-------|------|-------|------|-------|------|-------|------|-------|------|-------|------|-------|--------------------------------------------------------------------------------------------------------------------------------------------------------------------------------------------------------------------------------------------------------------------------------------------------------------------|------|-------|------|-------|------|-------|------|-------|------|-------|------|-------|
| $C_5H_9NO_2$<br>5-Hydroxy-2-piperidinone<br>NMR rank: 1<br>MS <sup>2</sup> rank: 167                                                                                                                                                                                                                                                                    | $C_5H_9NO_2$<br>Proline<br>NMR rank: 2<br>MS <sup>2</sup> rank: 26                 |       |      |       |      |       |      |       |      |       |      |       |      |       |                                                                                                                                                                                                                                                                                                                    |      |       |      |       |      |       |      |       |      |       |      |       |
| 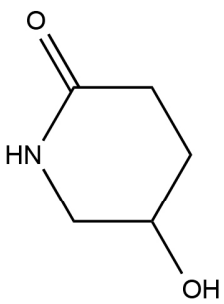                                                                                                                                                                                                                                                                       | 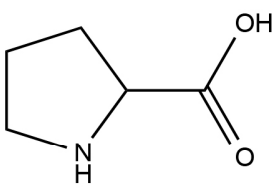 |       |      |       |      |       |      |       |      |       |      |       |      |       |                                                                                                                                                                                                                                                                                                                    |      |       |      |       |      |       |      |       |      |       |      |       |
| <b>Predicted HSQC</b><br><sup>1</sup> H (ppm) <sup>13</sup> C (ppm) <table> <tr><td>1.69</td><td>29.69</td></tr> <tr><td>2.09</td><td>29.69</td></tr> <tr><td>2.17</td><td>30.63</td></tr> <tr><td>2.51</td><td>30.63</td></tr> <tr><td>3.22</td><td>46.12</td></tr> <tr><td>3.57</td><td>46.12</td></tr> <tr><td>4.12</td><td>66.37</td></tr> </table> | 1.69                                                                               | 29.69 | 2.09 | 29.69 | 2.17 | 30.63 | 2.51 | 30.63 | 3.22 | 46.12 | 3.57 | 46.12 | 4.12 | 66.37 | <b>Predicted HSQC</b><br><sup>1</sup> H (ppm) <sup>13</sup> C (ppm) <table> <tr><td>1.75</td><td>23.93</td></tr> <tr><td>1.84</td><td>31.27</td></tr> <tr><td>2.04</td><td>31.27</td></tr> <tr><td>2.87</td><td>46.72</td></tr> <tr><td>3.04</td><td>46.72</td></tr> <tr><td>3.85</td><td>63.51</td></tr> </table> | 1.75 | 23.93 | 1.84 | 31.27 | 2.04 | 31.27 | 2.87 | 46.72 | 3.04 | 46.72 | 3.85 | 63.51 |
| 1.69                                                                                                                                                                                                                                                                                                                                                    | 29.69                                                                              |       |      |       |      |       |      |       |      |       |      |       |      |       |                                                                                                                                                                                                                                                                                                                    |      |       |      |       |      |       |      |       |      |       |      |       |
| 2.09                                                                                                                                                                                                                                                                                                                                                    | 29.69                                                                              |       |      |       |      |       |      |       |      |       |      |       |      |       |                                                                                                                                                                                                                                                                                                                    |      |       |      |       |      |       |      |       |      |       |      |       |
| 2.17                                                                                                                                                                                                                                                                                                                                                    | 30.63                                                                              |       |      |       |      |       |      |       |      |       |      |       |      |       |                                                                                                                                                                                                                                                                                                                    |      |       |      |       |      |       |      |       |      |       |      |       |
| 2.51                                                                                                                                                                                                                                                                                                                                                    | 30.63                                                                              |       |      |       |      |       |      |       |      |       |      |       |      |       |                                                                                                                                                                                                                                                                                                                    |      |       |      |       |      |       |      |       |      |       |      |       |
| 3.22                                                                                                                                                                                                                                                                                                                                                    | 46.12                                                                              |       |      |       |      |       |      |       |      |       |      |       |      |       |                                                                                                                                                                                                                                                                                                                    |      |       |      |       |      |       |      |       |      |       |      |       |
| 3.57                                                                                                                                                                                                                                                                                                                                                    | 46.12                                                                              |       |      |       |      |       |      |       |      |       |      |       |      |       |                                                                                                                                                                                                                                                                                                                    |      |       |      |       |      |       |      |       |      |       |      |       |
| 4.12                                                                                                                                                                                                                                                                                                                                                    | 66.37                                                                              |       |      |       |      |       |      |       |      |       |      |       |      |       |                                                                                                                                                                                                                                                                                                                    |      |       |      |       |      |       |      |       |      |       |      |       |
| 1.75                                                                                                                                                                                                                                                                                                                                                    | 23.93                                                                              |       |      |       |      |       |      |       |      |       |      |       |      |       |                                                                                                                                                                                                                                                                                                                    |      |       |      |       |      |       |      |       |      |       |      |       |
| 1.84                                                                                                                                                                                                                                                                                                                                                    | 31.27                                                                              |       |      |       |      |       |      |       |      |       |      |       |      |       |                                                                                                                                                                                                                                                                                                                    |      |       |      |       |      |       |      |       |      |       |      |       |
| 2.04                                                                                                                                                                                                                                                                                                                                                    | 31.27                                                                              |       |      |       |      |       |      |       |      |       |      |       |      |       |                                                                                                                                                                                                                                                                                                                    |      |       |      |       |      |       |      |       |      |       |      |       |
| 2.87                                                                                                                                                                                                                                                                                                                                                    | 46.72                                                                              |       |      |       |      |       |      |       |      |       |      |       |      |       |                                                                                                                                                                                                                                                                                                                    |      |       |      |       |      |       |      |       |      |       |      |       |
| 3.04                                                                                                                                                                                                                                                                                                                                                    | 46.72                                                                              |       |      |       |      |       |      |       |      |       |      |       |      |       |                                                                                                                                                                                                                                                                                                                    |      |       |      |       |      |       |      |       |      |       |      |       |
| 3.85                                                                                                                                                                                                                                                                                                                                                    | 63.51                                                                              |       |      |       |      |       |      |       |      |       |      |       |      |       |                                                                                                                                                                                                                                                                                                                    |      |       |      |       |      |       |      |       |      |       |      |       |

**Figure S1.** Chemical structure of the best and second best match when HSQC predictions of all  $C_5H_9NO_2$  isomers were queried against experimental HSQC of proline. HSQC prediction of 5-hydroxy-2-piperidinone was the best match (false positive) and proline was the second best match. However, when MS<sup>2</sup> predictions of all  $C_5H_9NO_2$  isomers were queried against experimental MS<sup>2</sup> of proline, 5-hydroxy-2-piperidinone was the 167<sup>th</sup> match, much higher than proline prediction (26<sup>th</sup> match). Therefore, combining NMR with MS<sup>2</sup> helped discrimination of the false positive.

|                                                                                                                                                         |                                                                                                                                           |                                                                                                                                           |
|---------------------------------------------------------------------------------------------------------------------------------------------------------|-------------------------------------------------------------------------------------------------------------------------------------------|-------------------------------------------------------------------------------------------------------------------------------------------|
| $C_6H_{13}NO_2$<br>Isoleucine<br>NMR rank: 1                                                                                                            | $C_6H_{13}NO_2$<br>3-methylaminopropyl acetate<br>NMR rank: 2                                                                             | $C_6H_{13}NO_2$<br>Leucine<br>NMR rank: 3                                                                                                 |
| 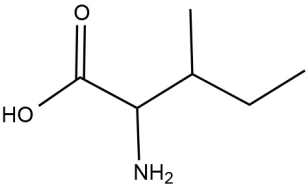                                                                       | 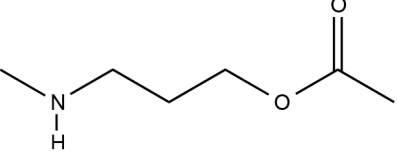                                                        | 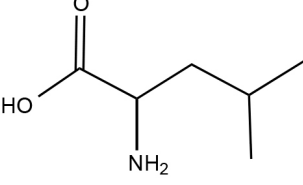                                                       |
| <b>Predicted HSQC</b><br><sup>1</sup> H (ppm) <sup>13</sup> C (ppm)<br>0.99 11.60<br>1.10 14.98<br>1.31 24.17<br>1.78 24.17<br>1.65 36.67<br>3.06 61.17 | <b>Predicted HSQC</b><br><sup>1</sup> H (ppm) <sup>13</sup> C (ppm)<br>2.02 20.55<br>1.88 29.61<br>2.42 33.39<br>2.93 49.62<br>4.15 62.95 | <b>Predicted HSQC</b><br><sup>1</sup> H (ppm) <sup>13</sup> C (ppm)<br>0.95 22.46<br>1.64 24.55<br>1.60 42.20<br>2.56 42.20<br>3.27 53.60 |

**Figure S2.** Chemical structure of the best, second and third best match when HSQC predictions of all  $C_6H_{13}NO_2$  isomers were queried against deconvoluted experimental HSQCs of thymidine, proline, phenylalanine, pantothenate, nicotinate, methionine, isoleucine, glutamine, leucine and valine. Isoleucine HSQC prediction found its experimental HSQC as the best match, 3-methylaminopropyl acetate HSQC prediction found experimental HSQC of proline as the second best match (false positive). Finally, leucine HSQC prediction found experimental HSQC of leucine as the third best match.

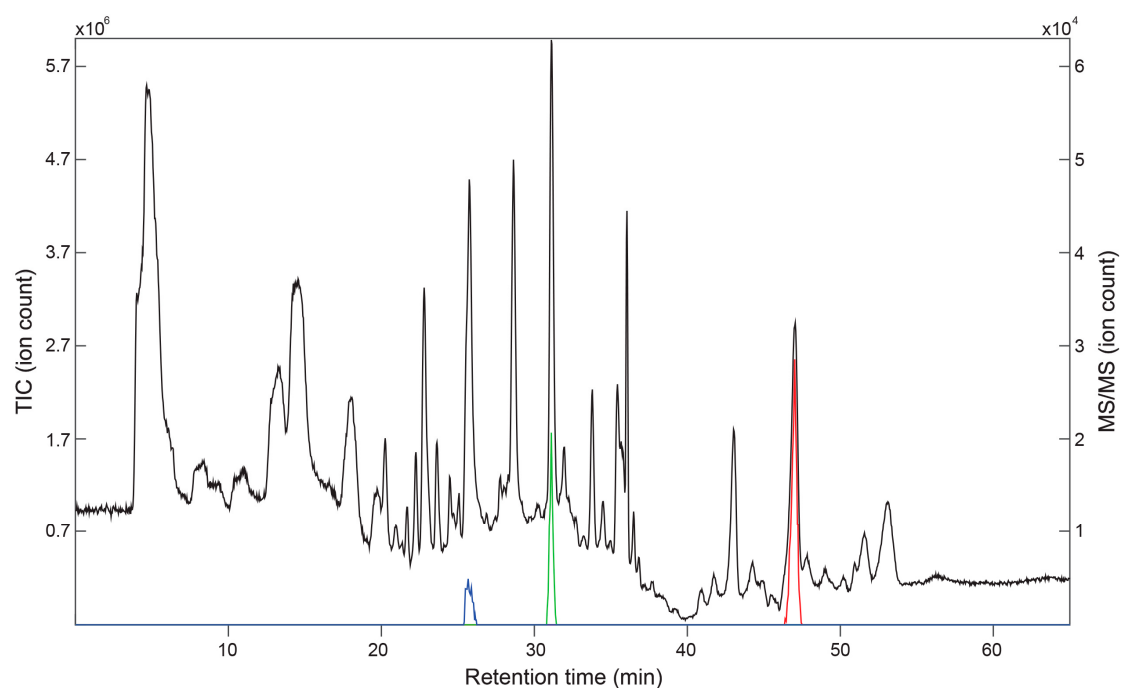

**Figure S3.** Total ion chromatogram (black) of *A. thaliana* metabolite extract. Overlaid LC-MS/MS chromatogram of three compounds selected based on precursor and daughter ions; blue (precursor  $m/z$ : 367.0976, daughter  $m/z$ : 115.0171, retention time: 25.8 min), green (precursor  $m/z$ : 341.1032, daughter  $m/z$ : 59.0114, retention time: 31.1 min) and red (precursor  $m/z$ : 436.0310, daughter  $m/z$ : 96.9567, retention time: 47.0 min). The red chromatogram belongs to glucoraphanin (see Figure 3).

Peak  $m/z$ : 178.01657  
Fragment mass: 178.01793 Da  
Fragment formula:  $[C_5H_9NO_4S]-H^-$

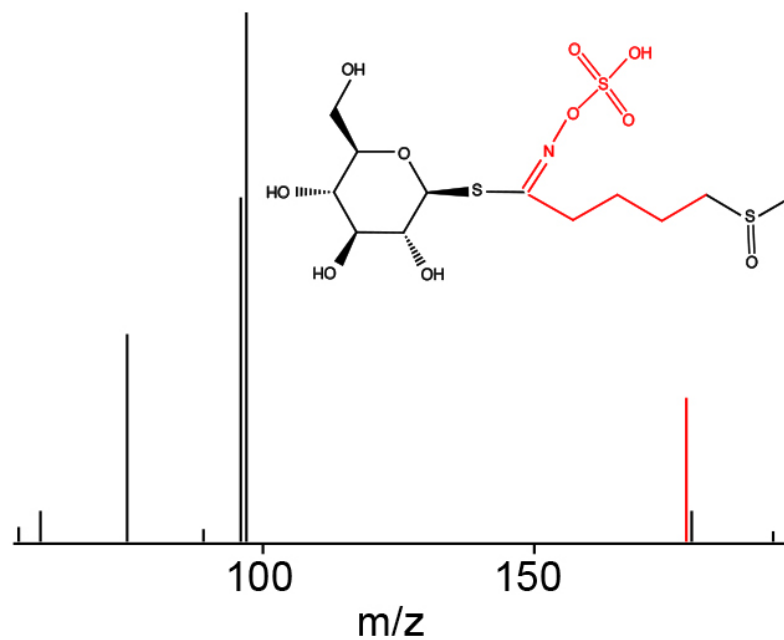

**Figure S4.** The MS/MS peak (red) differentiating MS/MS prediction of structure **c** from structure **a** and **b** in Figure 3. The peak experimentally appeared at  $\sim m/z$  178.0166. It matched to the theoretical mass of the fragment formula of  $[C_5H_9NO_4S]-H^-$  including the SO<sub>4</sub> group and part of the aliphatic chain of glucoraphanin (red).

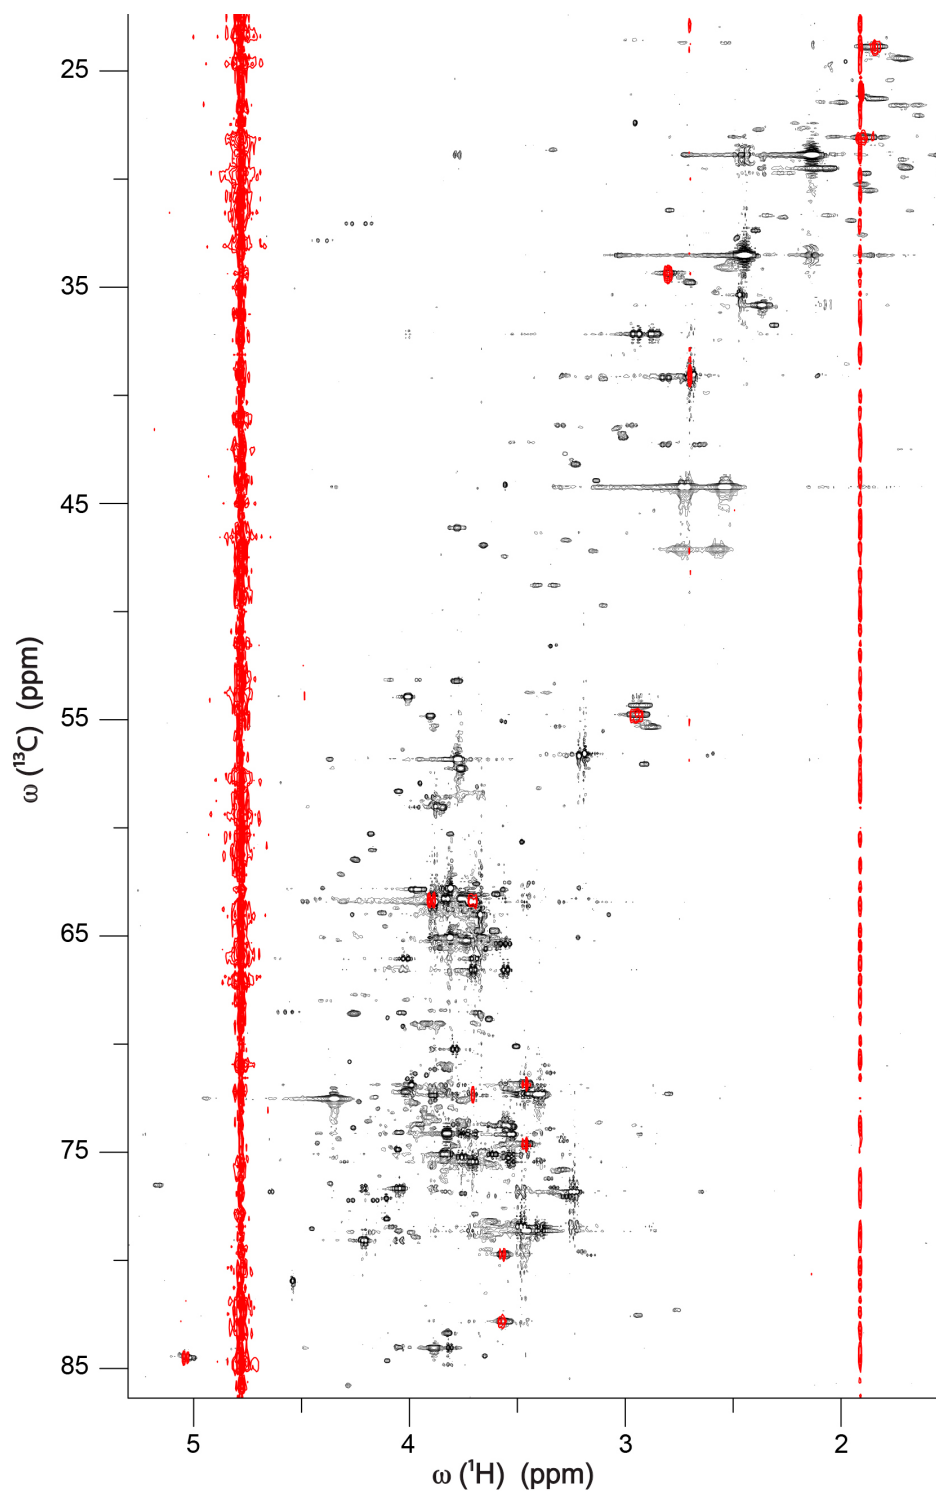

**Figure S5.** Overlay of the experimental 2D  $^{13}\text{C}$ - $^1\text{H}$  HSQC spectra of the unfractionated *A. thaliana* extract (black) and LC-fractionated *A. thaliana* extract at the retention time 47 min (red).

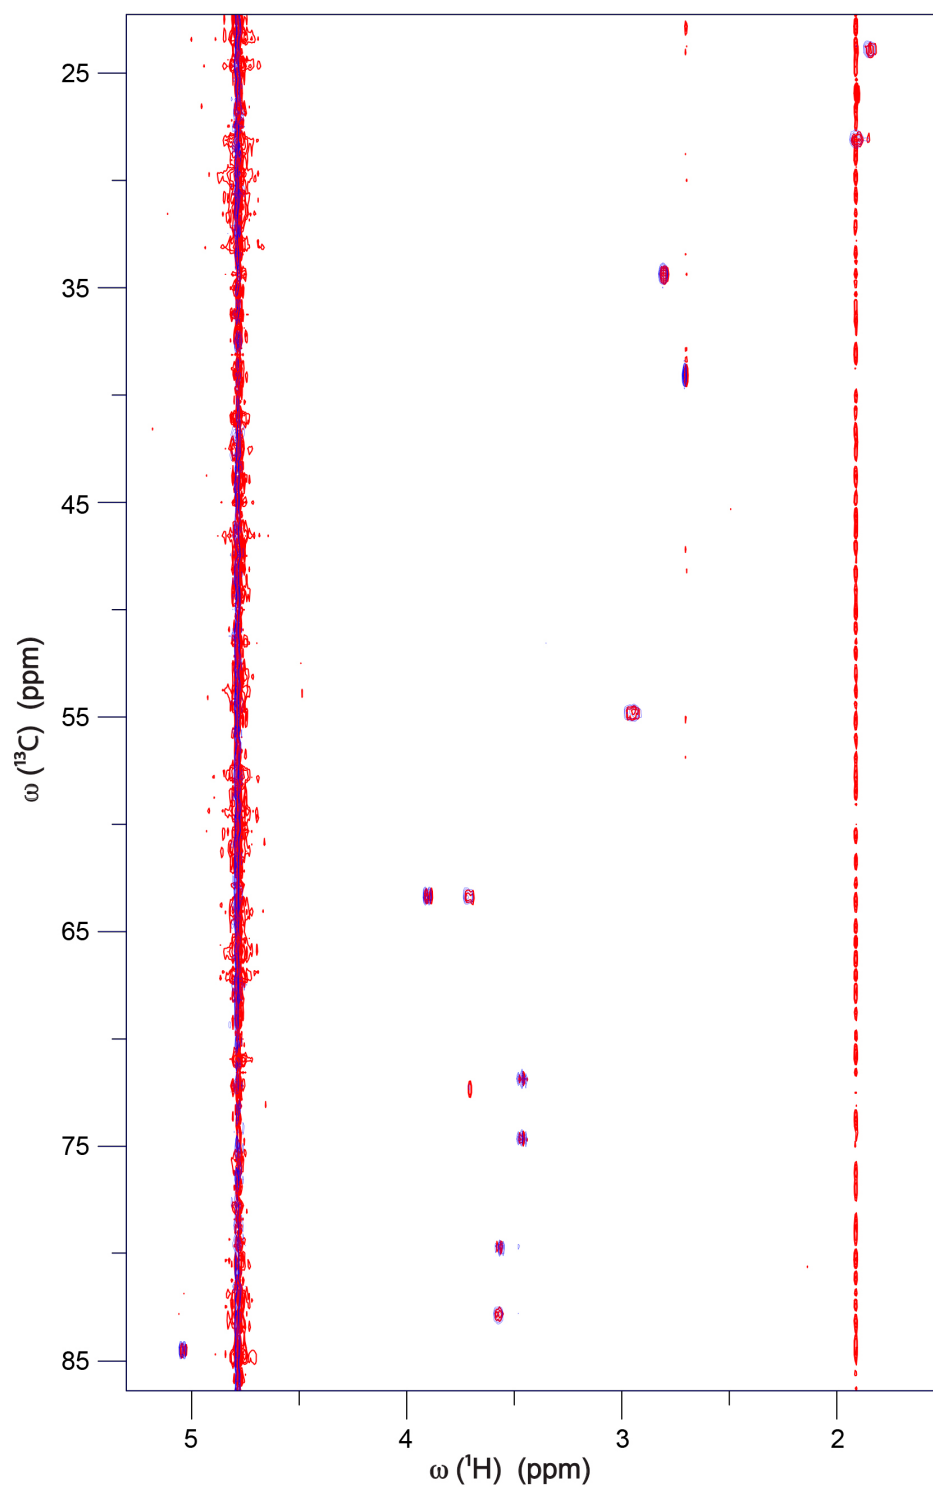

**Figure S6.** Overlay of the experimental 2D  $^{13}\text{C}$ - $^1\text{H}$  HSQC spectra of the LC-fractionated *A. thaliana* extract at the retention time 47 min (red) and glucoraphanin standard (blue).

**Table S1.** The list of precursor ions that were selected for fragmentation in this study

| metabolite    | precursor<br><i>m/z</i> | retention<br>time (min) | collision<br>energy (V) | ion mode | daughter<br><i>m/z</i> list <sup>a</sup>               |
|---------------|-------------------------|-------------------------|-------------------------|----------|--------------------------------------------------------|
| Thymidine     | 243.0967                | 12.2                    | 30                      | +        | 127.0499<br>110.0235<br>69.0336<br>84.0444<br>109.0398 |
| Proline       | 116.0701                | 30.8                    | 30                      | +        | 70.0651<br>71.0683<br>68.0489<br>57.0566<br>70.0908    |
| Phenylalanine | 166.0857                | 31.9                    | 30                      | +        | 103.0538<br>120.0803<br>77.0385<br>79.0540<br>93.0689  |
| Pantothenate  | 220.1170                | 45.4                    | 30                      | +        | 70.0292<br>67.0543<br>57.0703<br>90.0548<br>98.0231    |
| Nicotinate    | 124.0390                | 47.1                    | 30                      | +        | 78.0335<br>80.0491<br>53.0384<br>79.0403<br>52.0186    |
| Methionine    | 150.0575                | 32.1                    | 30                      | +        | 61.0108<br>56.0496<br>59.0727<br>58.0653<br>63.0063    |
| Isoleucine    | 132.1015                | 29.0                    | 30                      | +        | 69.0698<br>58.0661<br>71.0718<br>57.0565<br>70.0729    |
| Glutamine     | 147.0746                | 35.3                    | 30                      | +        | 84.0431<br>56.0488<br>85.0273<br>105.0321              |

|               |          |      |    |   |          |
|---------------|----------|------|----|---|----------|
| Leucine       | 132.1010 | 28.3 | 30 | + | 56.4253  |
|               |          |      |    |   | 55.0540  |
|               |          |      |    |   | 86.0963  |
|               |          |      |    |   | 53.0380  |
|               |          |      |    |   | 55.0173  |
| Valine        | 118.0850 | 30.5 | 30 | + | 69.0691  |
|               |          |      |    |   | 55.0540  |
|               |          |      |    |   | 57.0569  |
|               |          |      |    |   | 72.0798  |
|               |          |      |    |   | 56.0496  |
| Glucoraphanin | 436.0310 | 47.0 | 30 | - | 58.0642  |
|               |          |      |    |   | 96.9567  |
|               |          |      |    |   | 95.9484  |
|               |          |      |    |   | 74.9883  |
|               |          |      |    |   | 98.9526  |
|               |          |      |    |   | 178.0166 |

---

<sup>a</sup> Only the highest intensity (top five) daughter ions were included in the table.
